# Supplementary material
Source: Springer Nature journal article supplement (https://www.springermedizin.de/resource/supplementary/12936_2010_1711_MOESM4_ESM.pdf/9541566)

A.

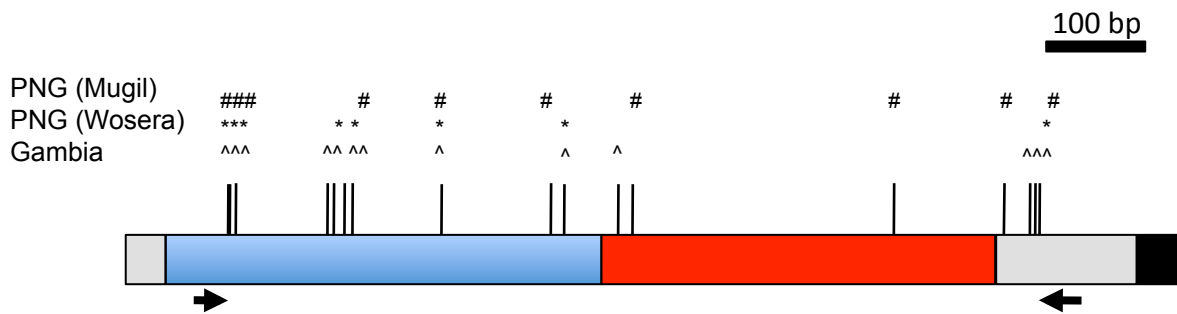

B.

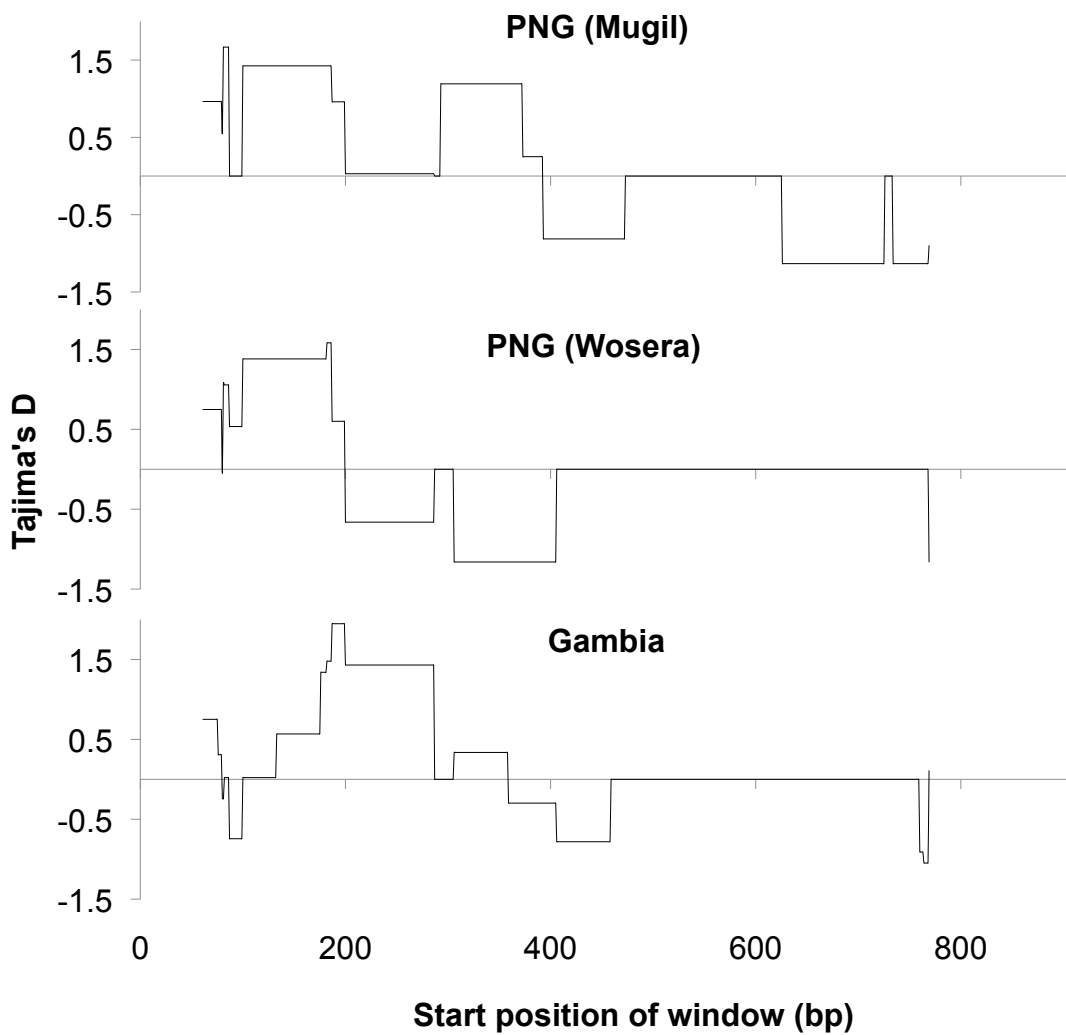

Supplement: MOESM4 [file 9541566]
